# Supplementary material
Source: PubMed Central journal article supplement (PMC5553289)
Supplement: NIHMS891981-supplement-Appendix.pdf [file NIHMS891981-supplement-Appendix.pdf]

Paskett E, Thompson B, Ammerman AS, Ortega AN, Marsteller J, Richardson D.  
Multilevel interventions to address health disparities show promise in improving population health.  
Health Aff (Millwood). 2016;35(8).

## Appendix

Centers for Population Health and Health Disparities Multilevel Interventions to Address Health Disparities Writing Group members are: Electra D. Paskett, PhD; Beti Thompson, PhD; Alice Ammerman, DrPH; Alexander N. Ortega, PhD; Jill Marsteller, PhD; DeJuran Richardson, PhD; Peter G. Kaufmann, MD; Kent Hoskins MD; Vish Viswanath, PhD; Donald Patrick, PhD; John Griffith, PhD, and Shobha Srinivasan, PhD.

The authors were supported by the following Centers for Population Health and Health Disparities grants from the National Cancer Institute (NCI) and the National Heart, Lung, and Blood Institute (NHLBI).

Grant P50CA148143-01, principal investigator (PI): Thompson, Beti, Understanding and Preventing Breast Cancer Disparities in Latinas

Grant P50CA148596-01, PI: Williams, David R., Lung Cancer Disparities Center: Jointly Addressing Race and Socioeconomic Status

Grant P50HL105187-01, PI: Cooper, Lisa A., Johns Hopkins Center to Eliminate Cardiovascular Health Disparities

Grant P50HL105185-01, PI: Tucker, Katherine L., Boston Puerto Rican Health Study - CVD Risk Factors

Grant P50CA105632-06, PI: Paskett, Electra D., Reducing Cervical Cancer in Appalachia

Grant P50HL105189-01, PI: Powell, Lynda H., Rush Center for Urban Health Equity

Grant P50HL105188-01, PI: Ortega, Alexander N., Family and Neighborhood Interventions to Reduce Heart Disease Risk in East L.A.

Grant P50CA106743-06, PI: Warnecke, Richard, UIC Center for Population Health and Health Disparities

Grant P50HL105184-01, PI: Ammerman, Alice S., Patterson, Cam, Center for Reduced CVD Disparities: Genes, Clinics, and Communities

Grant P50CA148110-01, PI: Buchwald, Dedra S., Center for Native Population Health Disparities
